# Supplementary material for: Sharing Responsibilities within the General Practice Team – A Cross-Sectional Study of Task Delegation in Germany
Source: PubMed Central journal article supplement (PMC4900540; doi:10.1371/journal.pone.0157248), 2016-06-09
Supplement: pone.0157248.s001.pdf [file pone.0157248.s001.pdf]

## Questionnaire for GPs participating in the study

### “Evaluation of the employment of VERAHs as part of a structured health plan in Baden-Wuerttemberg”

*Please mark your answer by placing a cross in the relevant box. You may cross more than one box if more than one answer is applicable.*

#### 1. Why did you decide to employ a VERAH in your practice?

- Possibility to delegate home visits
- Possibility to improve the health care of chronically ill patients
- Possibility to save time
- Other: \_\_\_\_\_

*The following questions concern changes in the practice that you have noticed since employing a VERAH. Please respond to each of the statements (please mark only one box in each line).*

| 2. Since a VERAH has worked in the practice ...                                                                        | Agree                    | Neither agree nor disagree | Disagree                 |
|------------------------------------------------------------------------------------------------------------------------|--------------------------|----------------------------|--------------------------|
| ... when making decisions related to patient health care I have involved her more than before she qualified as a VERAH | <input type="checkbox"/> | <input type="checkbox"/>   | <input type="checkbox"/> |
| ... delegating work to her has enabled me to save a significant amount of time                                         | <input type="checkbox"/> | <input type="checkbox"/>   | <input type="checkbox"/> |
| ... I can make better use of practice team resources now                                                               | <input type="checkbox"/> | <input type="checkbox"/>   | <input type="checkbox"/> |
| ... our chronically ill patients have benefited most from the VERAH's work                                             | <input type="checkbox"/> | <input type="checkbox"/>   | <input type="checkbox"/> |

*The following questions concern the delegation of specific tasks to VERAHs. Which of the following do you delegate exclusively to VERAHs, which to other HCAs/practice personnel and which do you carry out yourself? (Please mark only one box in each line)*

| 3. Tasks delegated ...                                                                              | ...mainly to VERAHs      | ...to all staff          | Not delegated at all     |
|-----------------------------------------------------------------------------------------------------|--------------------------|--------------------------|--------------------------|
| Vaccination management (e.g. preparing vaccination plans, explaining reasons for vaccinations etc.) | <input type="checkbox"/> | <input type="checkbox"/> | <input type="checkbox"/> |
| Medication management (e.g. comparing prescribed medications with medication packaging)             | <input type="checkbox"/> | <input type="checkbox"/> | <input type="checkbox"/> |
| Patient training (e.g. diabetes management, nutrition advice etc.)                                  | <input type="checkbox"/> | <input type="checkbox"/> | <input type="checkbox"/> |
| Wound management (e.g. changing bandages in case of leg ulcers etc.)                                | <input type="checkbox"/> | <input type="checkbox"/> | <input type="checkbox"/> |

| 3. Tasks delegated ...                                                                                                                                       | ...mainly to VERAHs      | ...to all staff          | Not delegated at all     |
|--------------------------------------------------------------------------------------------------------------------------------------------------------------|--------------------------|--------------------------|--------------------------|
| Carrying out diagnostic tests (e.g. blood glucose etc. )                                                                                                     | <input type="checkbox"/> | <input type="checkbox"/> | <input type="checkbox"/> |
| Structured assessments of a patient's physical condition (e.g. when VERAH visits a patient at home)                                                          | <input type="checkbox"/> | <input type="checkbox"/> | <input type="checkbox"/> |
| Structured assessment of a patient's mental condition                                                                                                        | <input type="checkbox"/> | <input type="checkbox"/> | <input type="checkbox"/> |
| Symptoms of complaint and/or disease (e.g. using a structured questionnaire etc.)                                                                            | <input type="checkbox"/> | <input type="checkbox"/> | <input type="checkbox"/> |
| Documentation of medically significant facts (e.g. falls, medication-related problems, changes in social environment etc.)                                   | <input type="checkbox"/> | <input type="checkbox"/> | <input type="checkbox"/> |
| Simple medical procedures (e.g. taking blood samples, injections)                                                                                            | <input type="checkbox"/> | <input type="checkbox"/> | <input type="checkbox"/> |
| Assessments (holistic assessment of a patient's health status and living conditions including problems and resources, for example on basis of questionnaire) | <input type="checkbox"/> | <input type="checkbox"/> | <input type="checkbox"/> |
| Re-assessments (monitoring)                                                                                                                                  | <input type="checkbox"/> | <input type="checkbox"/> | <input type="checkbox"/> |
| Preparation of care plan                                                                                                                                     | <input type="checkbox"/> | <input type="checkbox"/> | <input type="checkbox"/> |
| Dialog with other institutions (e.g. welfare services, nursing services)                                                                                     | <input type="checkbox"/> | <input type="checkbox"/> | <input type="checkbox"/> |
| Patient support in coordination and organization of treatment (e.g. by consulting other doctors or going to other health care institutions)                  | <input type="checkbox"/> | <input type="checkbox"/> | <input type="checkbox"/> |
| Home visits                                                                                                                                                  | <input type="checkbox"/> | <input type="checkbox"/> | <input type="checkbox"/> |
| Geriatric assessments (e.g. assessment of danger of falls, mini mental status exam, dementia test etc.)                                                      | <input type="checkbox"/> | <input type="checkbox"/> | <input type="checkbox"/> |

|                                                                                          |
|------------------------------------------------------------------------------------------|
| <p><b>4. What are the main advantages of employing a VERAH?</b></p> <hr/> <hr/> <hr/>    |
| <p><b>5. What are the main disadvantages of employing a VERAH?</b></p> <hr/> <hr/> <hr/> |

|                                                                                                                                                                                                                                                                                                                      |
|----------------------------------------------------------------------------------------------------------------------------------------------------------------------------------------------------------------------------------------------------------------------------------------------------------------------|
| <b>6. Sex</b><br><input type="checkbox"/> female <input type="checkbox"/> male                                                                                                                                                                                                                                       |
| <b>7. Year of birth:</b> <input type="text"/> <input type="text"/> <input type="text"/> <input type="text"/>                                                                                                                                                                                                         |
| <b>8. Years in private practice</b><br>Since <input type="text"/> <input type="text"/> years                                                                                                                                                                                                                         |
| <b>9. Previous participation in research project?</b><br><input type="checkbox"/> Yes <input type="checkbox"/> No                                                                                                                                                                                                    |
| <b>10. Family practices:</b><br><input type="checkbox"/> Solo practice<br><input type="checkbox"/> Joint practice                                                                                                                                                                                                    |
| <b>11. Practice personnel</b><br>Number of doctors in practice <input type="text"/> <input type="text"/><br>Number of non-physician staff <input type="text"/> <input type="text"/>                                                                                                                                  |
| <b>12. Location of practice</b><br><input type="checkbox"/> City with more than 100,000 inhabitants<br><input type="checkbox"/> Town with 20,000 to 100,000 inhabitants<br><input type="checkbox"/> Rural town with 5,000 to 20,000 inhabitants<br><input type="checkbox"/> Village with less than 5,000 inhabitants |

**Thank you very much for participating!**
